# Supplementary material for: Clinical Characteristics and Genetic Variants in Taiwanese Patients With PROM1-Related Inherited Retinal Disorders
Source: PubMed Central journal article supplement — Invest Ophthalmol Vis Sci. 2023 Nov 17;64(14):25. doi: 10.1167/iovs.64.14.25 (PMC10664721; doi:10.1167/iovs.64.14.25), 2023-11-17
Supplement: iovs-64-14-25_s001.pdf [file iovs-64-14-25_s001.pdf]

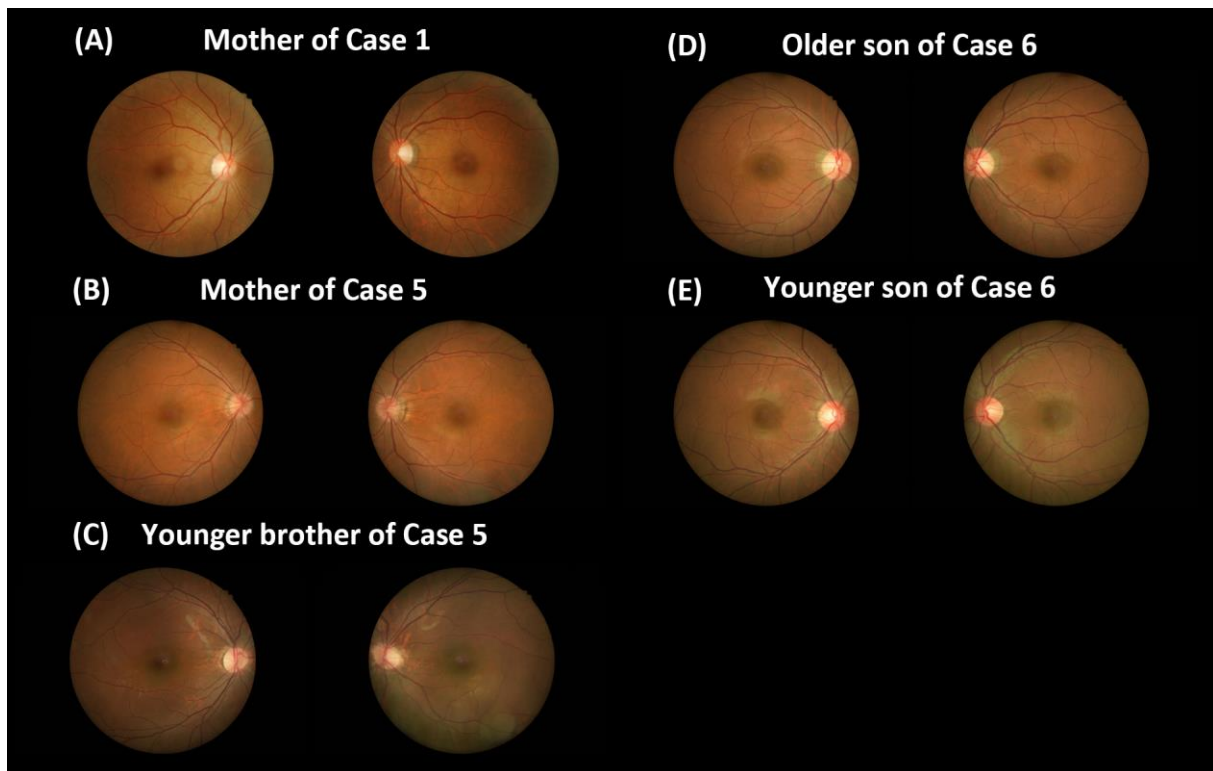

**Supplementary Figure 1** The color fundus of accessible family members.

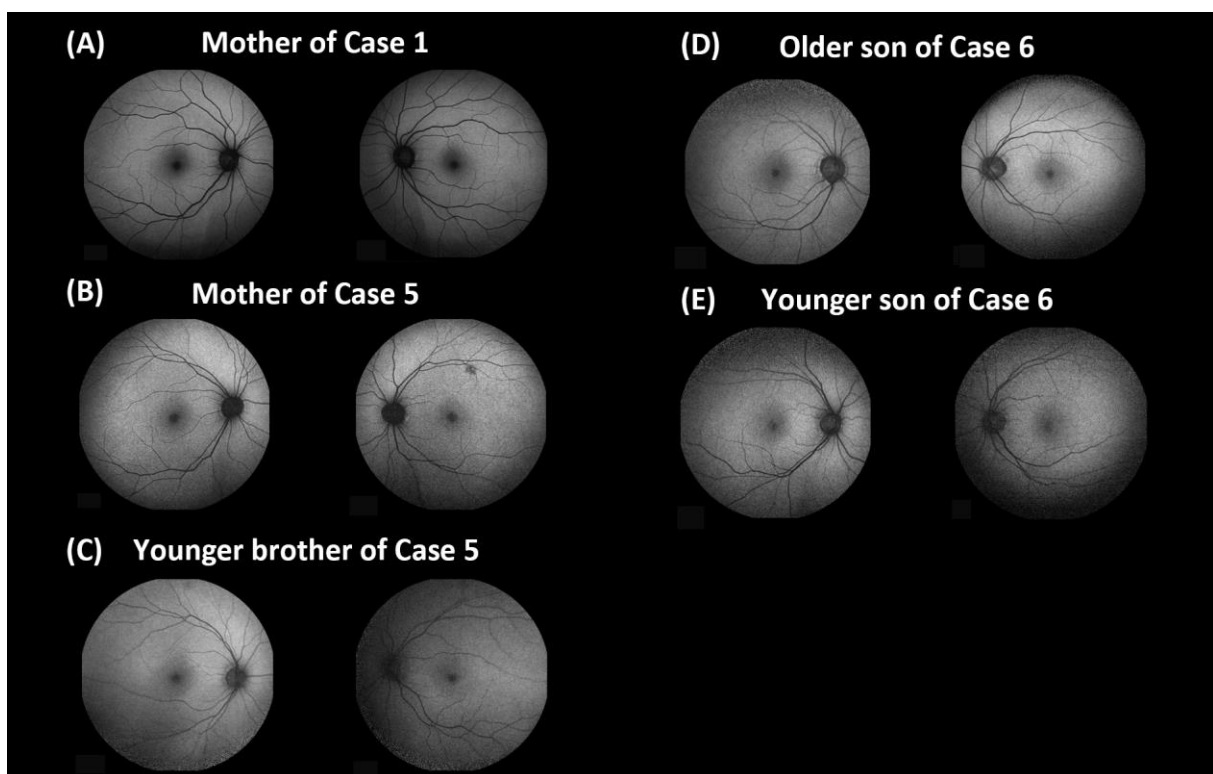

**Supplementary Figure 2** The fundus autofluorescence of accessible family members.

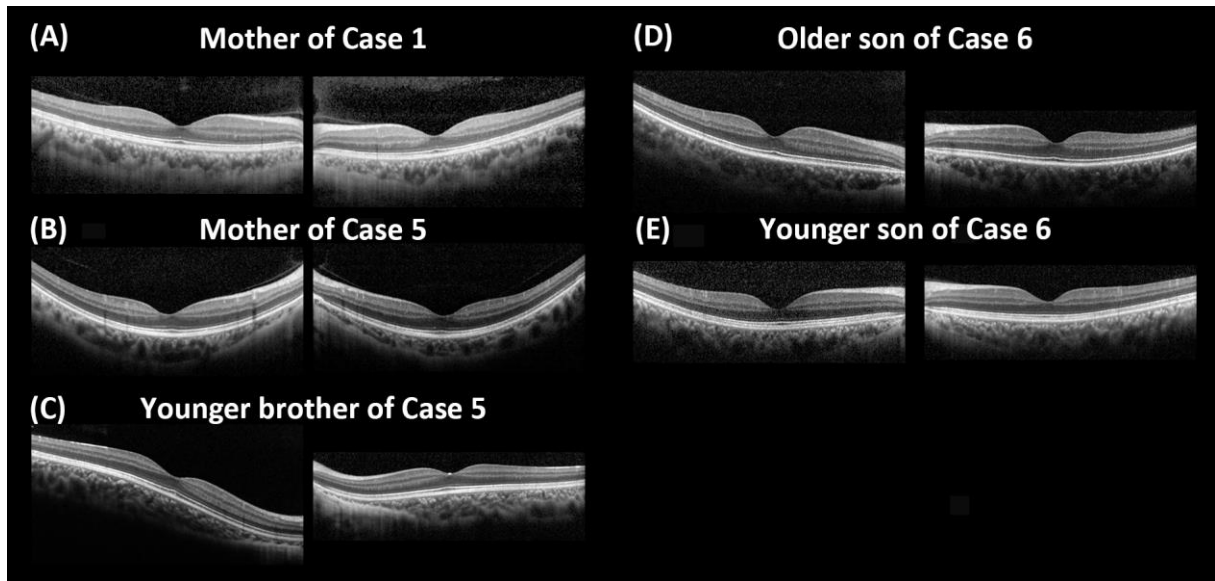

**Supplementary Figure 3** The optical coherence tomography of accessible family members.
