# Supplementary material for: Clinical Characteristics and Genetic Variants in Taiwanese Patients With PROM1-Related Inherited Retinal Disorders
Source: PubMed Central journal article supplement — Invest Ophthalmol Vis Sci. 2023 Nov 17;64(14):25. doi: 10.1167/iovs.64.14.25 (PMC10664721; doi:10.1167/iovs.64.14.25), 2023-11-17
Supplement: iovs-64-14-25_s002.pdf [file iovs-64-14-25_s002.pdf]

**Supplementary table 1** Results of pathogenicity assessment for detected variants

| Gene           | Nucleotide change* | Pathogenicity <sup>†</sup> | Rule | Description                                                                                                     |
|----------------|--------------------|----------------------------|------|-----------------------------------------------------------------------------------------------------------------|
| <i>PROM1</i>   | c.139del           | Pathogenic                 | PVS1 | This frameshift variant is expected to result in loss of function by nonsense-mediated mRNA decay.              |
|                |                    |                            | PM2  | The variant is not found in gnomAD.                                                                             |
| <i>PROM1</i>   | c.794del           | Pathogenic                 | PVS1 | This frameshift variant is expected to result in loss of function by nonsense-mediated mRNA decay.              |
|                |                    |                            | PM2  | The variant is not found in gnomAD.                                                                             |
| <i>PROM1</i>   | c.1238T>A          | Likely pathogenic          | PS2  | <i>De novo</i> (both maternity and paternity confirmed) in a patient with the disease and no family history.    |
|                |                    |                            | PM2  | The variant is not found in gnomAD.                                                                             |
|                |                    |                            | PP3  | Multiple lines of computational evidence support a deleterious effect on the gene or gene product.              |
| <i>PROM1</i>   | c.1117C>T          | Pathogenic                 | PS3  | Functional studies demonstrate a damaging effect with reduced actin binding as well as protein mislocalization. |
|                |                    |                            | PM2  | This missense variant is not found in gnomAD.                                                                   |
|                |                    |                            | PP3  | Multiple lines of computational evidence support a deleterious effect on the gene or gene product.              |
| <i>PROM1</i>   | c.2110C>T          | Pathogenic                 | PS2  | <i>De novo</i> (both maternity and paternity confirmed) in a patient with the disease and no family history.    |
|                |                    |                            | PM2  | The variant is not found in gnomAD.                                                                             |
|                |                    |                            | PP3  | Multiple lines of computational evidence support a deleterious effect on the gene or gene product.              |
| <i>CACNA1F</i> | c.3115G>T          | Pathogenic                 | PVS1 | This nonsense variant is expected to result in loss of function by nonsense-mediated mRNA decay.                |
|                |                    |                            | PM2  | The variant is not found in gnomAD.                                                                             |

\*: The variants of *PROM1* and *CACNA1F* gene were presented based on NM\_006017.3 and NM\_001256789.3, respectively.

†: The pathogenicity of variant was presented according to the ACMG guidelines.
