# Supplementary material for: Clinical Characteristics and Genetic Variants in Taiwanese Patients With PROM1-Related Inherited Retinal Disorders
Source: PubMed Central journal article supplement — Invest Ophthalmol Vis Sci. 2023 Nov 17;64(14):25. doi: 10.1167/iovs.64.14.25 (PMC10664721; doi:10.1167/iovs.64.14.25), 2023-11-17
Supplement: iovs-64-14-25_s003.pdf [file iovs-64-14-25_s003.pdf]

**Supplementary table 2** Genetic profile of patients with inherited retinal diseases and associated families

| No. | Family | Relationship    | Symptom    | Ocular history      | Genotype     | Inheritance        | Gene           | Nucleotide change | Amino acid change | Variant effect |
|-----|--------|-----------------|------------|---------------------|--------------|--------------------|----------------|-------------------|-------------------|----------------|
| 1   | 1      | Mother          | Unaffected | Myopia              | Heterozygous | AD                 | <i>PROM1</i>   | c.139del          | p.His47IlefsTer12 | Frameshift     |
| 2   | 2      | Father          | Unaffected | Nil                 | Heterozygous | AD                 | <i>PROM1</i>   | c.139del          | p.His47IlefsTer12 | Frameshift     |
|     |        | Mother          | Unaffected | Nil                 | Heterozygous | AD                 | <i>PROM1</i>   | c.139del          | p.His47IlefsTer12 | Frameshift     |
| 5   | 5      | Father          | Unaffected | Nil                 | N/A          | N/A                | N/A            | N/A               | N/A               | N/A            |
|     |        |                 |            |                     | Heterozygous | AD                 | <i>PROM1</i>   | c.139del          | p.His47IlefsTer12 | Frameshift     |
|     |        | Mother          | Unaffected | Nil                 | Hemizygous   | X-linked recessive | <i>CACNA1F</i> | c.3115G>T         | p.Glu1039Ter      | Stop gained    |
|     |        | Younger brother | Unaffected | Myopia<br>Amblyopia | Hemizygous   | X-linked recessive | <i>CACNA1F</i> | c.3115G>T         | p.Glu1039Ter      | Stop gained    |
| 6   | 6      | Older son       | Unaffected | Myopia              | Heterozygous | AD                 | <i>PROM1</i>   | c.794del          | p.Glu265GlyfsTer9 | Frameshift     |
|     |        | Younger son     | Unaffected | Myopia              | Heterozygous | AD                 | <i>PROM1</i>   | c.794del          | p.Glu265GlyfsTer9 | Frameshift     |

Abbreviation: AD, autosomal dominant; AR, autosomal recessive.
